# Supplementary material for: Neutral ceramidase regulates breast cancer progression by metabolic programming of TREM2-associated macrophages
Source: PubMed Central journal article supplement (PMC10834982; doi:10.1038/s41467-024-45084-7), 2024-02-01
Supplement: 41467_2024_45084_MOESM3_ESM.pdf [file 41467_2024_45084_MOESM3_ESM.pdf]

## Reporting Summary

Nature Portfolio wishes to improve the reproducibility of the work that we publish. This form provides structure for consistency and transparency in reporting. For further information on Nature Portfolio policies, see our [Editorial Policies](#) and the [Editorial Policy Checklist](#).

### Statistics

For all statistical analyses, confirm that the following items are present in the figure legend, table legend, main text, or Methods section.

n/a Confirmed

- The exact sample size ( $n$ ) for each experimental group/condition, given as a discrete number and unit of measurement
- A statement on whether measurements were taken from distinct samples or whether the same sample was measured repeatedly
- The statistical test(s) used AND whether they are one- or two-sided  
*Only common tests should be described solely by name; describe more complex techniques in the Methods section.*
- A description of all covariates tested
- A description of any assumptions or corrections, such as tests of normality and adjustment for multiple comparisons
- A full description of the statistical parameters including central tendency (e.g. means) or other basic estimates (e.g. regression coefficient) AND variation (e.g. standard deviation) or associated estimates of uncertainty (e.g. confidence intervals)
- For null hypothesis testing, the test statistic (e.g.  $F$ ,  $t$ ,  $r$ ) with confidence intervals, effect sizes, degrees of freedom and  $P$  value noted  
*Give  $P$  values as exact values whenever suitable.*
- For Bayesian analysis, information on the choice of priors and Markov chain Monte Carlo settings
- For hierarchical and complex designs, identification of the appropriate level for tests and full reporting of outcomes
- Estimates of effect sizes (e.g. Cohen's  $d$ , Pearson's  $r$ ), indicating how they were calculated

*Our web collection on [statistics for biologists](#) contains articles on many of the points above.*

### Software and code

Policy information about [availability of computer code](#)

Data collection

FACS DIVA version 6 was used to collect all flow data, IMC images were acquired using Hyperion Imaging Mass Cytometer. CyToF were performed with a Helios Mass Cytometer .

Data analysis

Flowjo v10.7.1 to analyze flow data and data were plotted using tSNE or UMAP analysis for CyTOF analysis. Prism 8 for statistical analysis, Associations between NcDase (ASAH2) mRNA expression and infiltration of different cell types from the TME were analyzed by using xCell2, QUANTISEQ, CIBERSORT and TIMER2.0.

For manuscripts utilizing custom algorithms or software that are central to the research but not yet described in published literature, software must be made available to editors and reviewers. We strongly encourage code deposition in a community repository (e.g. GitHub). See the Nature Portfolio [guidelines for submitting code & software](#) for further information.

## Data

Policy information about [availability of data](#)

All manuscripts must include a [data availability statement](#). This statement should provide the following information, where applicable:

- Accession codes, unique identifiers, or web links for publicly available datasets
- A description of any restrictions on data availability
- For clinical datasets or third party data, please ensure that the statement adheres to our [policy](#)

The data generated in this study are available in the data source files. RNAseq data has been uploaded to NIH SRA database (<https://www.ncbi.nlm.nih.gov/sra>) under accession number PRJNA936597.

## Human research participants

Policy information about [studies involving human research participants and Sex and Gender in Research](#).

|                             |                                |
|-----------------------------|--------------------------------|
| Reporting on sex and gender | No human research participants |
| Population characteristics  | No human research participants |
| Recruitment                 | No human research participants |
| Ethics oversight            | No human research participants |

Note that full information on the approval of the study protocol must also be provided in the manuscript.

## Field-specific reporting

Please select the one below that is the best fit for your research. If you are not sure, read the appropriate sections before making your selection.

- Life sciences       Behavioural & social sciences       Ecological, evolutionary & environmental sciences

For a reference copy of the document with all sections, see [nature.com/documents/nr-reporting-summary-flat.pdf](https://www.nature.com/documents/nr-reporting-summary-flat.pdf)

## Life sciences study design

All studies must disclose on these points even when the disclosure is negative.

|                 |                                                                                                                                                                                             |
|-----------------|---------------------------------------------------------------------------------------------------------------------------------------------------------------------------------------------|
| Sample size     | Sample size was determined by pilot experiments and power analysis.                                                                                                                         |
| Data exclusions | No data exclusions                                                                                                                                                                          |
| Replication     | All results were repeated at least three independent times unless otherwise specified. Similar data were obtained in independent experiments.                                               |
| Randomization   | Biological samples (cultured cells and tissue extracts) and animals (mice) were allocated randomly into the different groups.                                                               |
| Blinding        | Investigators were blinded to group allocation during data collection and analysis. But blinding is not possible in the experiments of treatment since the treatment effect was so obvious. |

## Reporting for specific materials, systems and methods

We require information from authors about some types of materials, experimental systems and methods used in many studies. Here, indicate whether each material, system or method listed is relevant to your study. If you are not sure if a list item applies to your research, read the appropriate section before selecting a response.

## Materials &amp; experimental systems

|     |                                     |                                     |                               |
|-----|-------------------------------------|-------------------------------------|-------------------------------|
| n/a | <input type="checkbox"/>            | <input checked="" type="checkbox"/> | Involvement in the study      |
|     | <input type="checkbox"/>            | <input checked="" type="checkbox"/> | Antibodies                    |
|     | <input type="checkbox"/>            | <input checked="" type="checkbox"/> | Eukaryotic cell lines         |
|     | <input checked="" type="checkbox"/> | <input type="checkbox"/>            | Palaeontology and archaeology |
|     | <input type="checkbox"/>            | <input checked="" type="checkbox"/> | Animals and other organisms   |
|     | <input checked="" type="checkbox"/> | <input type="checkbox"/>            | Clinical data                 |
|     | <input checked="" type="checkbox"/> | <input type="checkbox"/>            | Dual use research of concern  |

## Methods

|     |                                     |                                     |                          |
|-----|-------------------------------------|-------------------------------------|--------------------------|
| n/a | <input type="checkbox"/>            | <input checked="" type="checkbox"/> | Involvement in the study |
|     | <input checked="" type="checkbox"/> | <input type="checkbox"/>            | ChIP-seq                 |
|     | <input type="checkbox"/>            | <input checked="" type="checkbox"/> | Flow cytometry           |
|     | <input checked="" type="checkbox"/> | <input type="checkbox"/>            | MRI-based neuroimaging   |

## Antibodies

## Antibodies used

Ly6G (141 Pr) Fluidigm Cat# 3141008B; RRID: AB\_2814678  
 CD11c (142 Nd) Fluidigm Cat# 3142003B; RRID: AB\_2814737  
 CD8a (168Er) Fluidigm Cat# 3168003B; RRID: AB\_2811241  
 CD11b (172Yb) Fluidigm Cat# 3172012B; RRID: AB\_2661809  
 CD19 (149 Sm) Fluidigm Cat# 3149002B; RRID: AB\_2814679  
 CD25 (151 Eu) Fluidigm Cat# 3151007B; RRID: AB\_2827880  
 F4/80 (146 Nd) Fluidigm Cat# 3146008B; RRID: AB\_2895117  
 CD36 (147 Sm) Fluidigm Cat# 3147018B; RRID: N/A  
 CD3e (152 Sm) Fluidigm Cat# 3152004B; RRID: AB\_2687836  
 CD274 (153Eu) Fluidigm Cat# 3153016B; RRID: AB\_2687837  
 CD62L (160 Gd) Fluidigm Cat# 3160008B; RRID: AB\_2687840  
 CD73 (154 Sm) Fluidigm Cat# 3154019B; RRID: AB\_2813854  
 Ly6c (150Nd) Fluidigm Cat# 3150010B; RRID: AB\_2895118  
 CX3CR1 (164 Dy) Fluidigm Cat# 3164023B; RRID: AB\_2832247  
 CD103 (163 Dy) This study N/A  
 CD206 (169 Tm) Fluidigm Cat# 3169021B; RRID: AB\_2832249  
 NK1.1 (170 Er) Fluidigm Cat# 3170002B; RRID: AB\_2885023  
 CD44 (162Dy) Fluidigm Cat# 3162030B; RRID: AB\_2814898  
 CD4 (145Nd) Fluidigm Cat# 3145002B; RRID: AB\_2687832  
 MHCII (209Bi) Fluidigm Cat# 3209006B; RRID: AB\_2885025  
 CD45 (89Y) Fluidigm Cat# 3089005B; RRID: AB\_2651152  
 B220 (176 Yb) Fluidigm Cat# 3176002B; RRID: AB\_2895123  
 All flow cytometer antibodies were obtained from Thermo Fisher Scientific except specified.  
 PerCP-Cy5.5 labeled anti-IL-17A (TC11-18H10.1, Biolegend), 506943  
 PE- labeled anti-IL-17A (TC11-18H10.1, Biolegend), 506903  
 FITC- labeled anti-IL-17A (TC11-18H10.1), A15377  
 APC-labeled anti-IL-17A (TC11-18H10.1, Biolegend), cat# 506915  
 PE- labeled anti-IL-4 (11B11), Cat# 12-7101-41;  
 APC-labeled anti-IL-4 (11B11) Cat# 17-7041-82;  
 PE--labelled anti-IL-10 (JES5-16E3) Cat# 12-7101-82  
 APC-labelled anti-IL-10 (JES5-16E3), Cat# 17-7101-82  
 APC- labeled anti-IFN- $\gamma$  (XMG1.2), Cat# 17-7311-82  
 PE-Cy7-labeled anti-IFN- $\gamma$  (XMG1.2), Cat# 25-7311-82  
 PE-labeled anti-Foxp3 (FJK-16s), Cat# 12-5773-82  
 PE- labeled anti-CD11b (M1/70), Cat# 12-0112-82  
 FITC- labeled anti-CD11b (M1/70), Cat# 12-0112-82  
 APC-labeled anti-CD11b (M1/70), Cat# 17-0112-82  
 PE- labeled anti-CD4 (RM4-5), Cat# 12-0042-82  
 FITC- labeled anti-CD4 (RM4-5), Cat# 12-0042-82  
 APC-labeled anti-CD4 (RM4-5), Cat# 17-0042-82  
 PE-Cy7-labeled anti-CD3 (145-2C11), Cat# 25-0031-82  
 PE-anti-Gr-1 (RB6-8C5), Cat# 12-5931-82  
 PE- labeled anti-mouse Ly6G (1A8), Cat# 12-9668-82  
 FITC-labeled anti-mouse Ly6G (1A8), Cat# 11-9668-82  
 APC-conjugated CD45.2 (104), Cat# 17-0454-82  
 PE-conjugated anti-CD45.1 (A20), Cat# 12-0453-82  
 FITC- labeled anti-mouse Ly6G (1A8), Cat# 11-9668-82  
 PerCP-Cy5.5 labeled anti-mouse Ly6G (1A8), Cat# 11-9668-82  
 APC-anti-Lag-3 (C9B7W), Cat# 17-2231-82  
 PE-anti-CD244.2 (2B4), Cat# 12-2441-82  
 PE-anti-TOX (TXRX10), Cat# 12-6502-82  
 PE-anti-CD39 (24DM1), Cat# 25-0391-82  
 PE-anti-Trem2 (237920, R&D), Cat# FAB17291P

PerCP-Cy5.5, PE-, FITC- or APC-labeled anti-IL-17A (TC11-18H10.1, 1:100), PE- or APC-labeled anti-IL-4 (11B11, eBioscience, Thermo fisher, 1:200), PE- or APC-labelled anti-IL-10 (JES5-16E3, 1:100), APC- or PE-Cy7-labeled anti-IFN- $\gamma$  (XMG1.2, 1:200), PE-labeled anti-Foxp3 (FJK-16s, eBioscience, Thermo fisher), PE-, FITC- or APC-labeled anti-CD11b (M1/70, 1:300), PE-, FITC- or APC-labeled anti-CD4 (RM4-5, 1:300), PE-Cy7-labeled anti-CD3 (145-2C11, 1:100), PE-anti-Gr-1 (RB6-8C5, 1:600), PE- or FITC-labeled anti-mouse Ly6G (1A8, 1:200), APC-conjugated CD45.2 (104, 1:400), PE-conjugated anti-CD45.1 (A20, 1:400), FITC-, PerCP-Cy5.5 or Pacific Blue-labelled anti-CD45 (30-F11, 1:400), APC-anti-Lag-3 (C9B7W, 1:100), PE-anti-CD244.2 (2B4, 1:100), PE-anti-TOX (TXRX10, 1:100), APC-anti-CD39 (24DM1, 1:100),

Validation

All antibodies were validated for their use in the application and species according to manufacturer's websites. IHC antibodies were validated as compared to an isotype control. Flow antibodies were validated by titration.

## Eukaryotic cell lines

Policy information about [cell lines and Sex and Gender in Research](#)

|                                                                   |                                                                                                    |
|-------------------------------------------------------------------|----------------------------------------------------------------------------------------------------|
| Cell line source(s)                                               | E0771 and Raw264.7 were obtained from ATCC.                                                        |
| Authentication                                                    | IDEXX BioResearch company helps check for cell line contamination with cell lines of other species |
| Mycoplasma contamination                                          | Cells were confirmed mycoplasma negative using ATCC Mycoplasma detection kit                       |
| Commonly misidentified lines (See <a href="#">ICLAC</a> register) | None of the cell lines used in the study is listed as Commonly misidentified lines.                |

## Animals and other research organisms

Policy information about [studies involving animals; ARRIVE guidelines](#) recommended for reporting animal research, and [Sex and Gender in Research](#)

|                         |                                                                                                                                                                                                                                                                                                                                                                                                                                                                                                                                                                                                                                                                                                                                                                                                                                                                                                                                                                                                                                                                                                                                                                                     |
|-------------------------|-------------------------------------------------------------------------------------------------------------------------------------------------------------------------------------------------------------------------------------------------------------------------------------------------------------------------------------------------------------------------------------------------------------------------------------------------------------------------------------------------------------------------------------------------------------------------------------------------------------------------------------------------------------------------------------------------------------------------------------------------------------------------------------------------------------------------------------------------------------------------------------------------------------------------------------------------------------------------------------------------------------------------------------------------------------------------------------------------------------------------------------------------------------------------------------|
| Laboratory animals      | MMTV-PyMT mice [B6. FVB/N-Tg(MMTV-PyVT)634Mul/J (Stock No: 022974, Age: 6 week - 1 year) , C57BL/6 mice (6-7 week), Trem2 <sup>-/-</sup> mice and Rag1-deficient mice (Rag1 <sup>-/-</sup> ) mice were obtained from Jackson Laboratory. To generate myeloid cell-specific NcDase-deleted mice, NcDasefl/fl mice were first generated using CRISPR/Cas9 technology by Biocytogen and then bred with LysM-cre mice (Jackson Laboratory) to generate control NcDasefl/fl mice and LysM-cre NcDasefl/fl cKO mice (designated as NcDasecKO). NcDase global knockout mice (NcDase <sup>-/-</sup> ) were from Dr. Yusuf A. Hannun (Stony Brook University) and had been backcrossed at least 8 generations to C57BL/61. NcDase <sup>-/-</sup> mice were crossed with MMTV-PyMT mice or Rag1 <sup>-/-</sup> mice to generate NcDase <sup>-/-</sup> PyMT mice or Rag1 <sup>-/-</sup> -NcDase <sup>-/-</sup> mice. WT PyMT and NcDase <sup>-/-</sup> PyMT animals used for breast cancer experiments were female littermates. All mice were housed under SPF condition with free food and water supply with 12 h dark/light cycle at room temperature with controlled humidity (around 55%). |
| Wild animals            | No wild animals was used in this study.                                                                                                                                                                                                                                                                                                                                                                                                                                                                                                                                                                                                                                                                                                                                                                                                                                                                                                                                                                                                                                                                                                                                             |
| Reporting on sex        | Only female mice have been used for this study due to the nature of the tumor studied.                                                                                                                                                                                                                                                                                                                                                                                                                                                                                                                                                                                                                                                                                                                                                                                                                                                                                                                                                                                                                                                                                              |
| Field-collected samples | No samples were from field.                                                                                                                                                                                                                                                                                                                                                                                                                                                                                                                                                                                                                                                                                                                                                                                                                                                                                                                                                                                                                                                                                                                                                         |
| Ethics oversight        | The university of Louisville IACUC committee approved this study.                                                                                                                                                                                                                                                                                                                                                                                                                                                                                                                                                                                                                                                                                                                                                                                                                                                                                                                                                                                                                                                                                                                   |

Note that full information on the approval of the study protocol must also be provided in the manuscript.

## Flow Cytometry

### Plots

Confirm that:

- The axis labels state the marker and fluorochrome used (e.g. CD4-FITC).
- The axis scales are clearly visible. Include numbers along axes only for bottom left plot of group (a 'group' is an analysis of identical markers).
- All plots are contour plots with outliers or pseudocolor plots.
- A numerical value for number of cells or percentage (with statistics) is provided.

## Methodology

Sample preparation

Tumor infiltrating cells were isolated from both subcutaneous and autochthonous tumors at the indicated time points. Briefly, tumor tissues from sacrificed mice were prepared by mechanical disruption followed by digestion for 45 min with collagenase I (Worthington Biochemical, LS004197) and DNase I (1 mg/ml; Roche, 11284932001) at 37°C. Digested tissues were incubated 5 min at 37°C with EDTA (0.5 M) to prevent DC/T cell aggregates and mashed through filters. Viability dye was added to distinguish dead cells, these has been described in depth in the methods section.

Instrument

XF-96 Extracellular Flux Analyzer, FACS Aria II, FACS cantoll cytometer (BD Bioscience)

Software

Flowjo v10.7.1 to analyze flow data, prism 8 for statistical analysis, Associations between NcDase (ASAH2) mRNA expression and infiltration of different cell types from the TME were analyzed by using xCell2, CIBERSORT, and TIMER2.0.

Cell population abundance

If sorting was used, purify was always > 90%, these has been described in the methods section.

Gating strategy

We used viability dye to gate out dead cells and then use CD45 to gate all immune cells, then different subsets of cells were gated from CD45+ cells.

Tick this box to confirm that a figure exemplifying the gating strategy is provided in the Supplementary Information.
